# Supplementary material
Source: publisher figshare collection journal article supplement (https://rs.figshare.com/ndownloader/files/14401274)
Supplement: Supplementary file 1 [file 14401274]

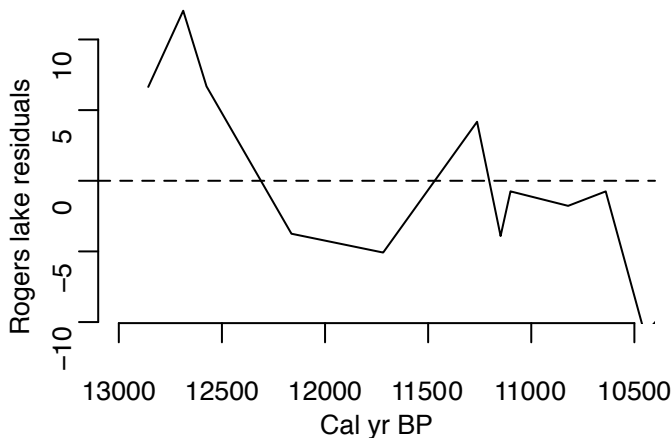

Figure S1. Residuals from the linear model in figure 1c. The long-term trend in residuals indicates autocorrelation that future analyses should account for, either within the covariance matrix of the residuals (e.g. using an autoregressive generalized least squares model) or by evaluating additional environmental covariates that may account for the trend

Detecting past changes in vegetation resilience in the context of a changing climate. W. John Calder and Bryan Shuman
